# Supplementary material for: HLA-DQB1*02–Restricted HPV-16 E7 Peptide–Specific CD4+ T-Cell Immune Responses Correlate with Regression of HPV-16–Associated High-Grade Squamous Intraepithelial Lesions
Source: Oxford University Press journal article supplement (doi:10.1158/1078-0432.ccr-06-2916), 2007-04-15
Supplement: 10780432ccr062916-sup-supplementary_figure_s1.pdf [file 10780432ccr062916-sup-supplementary_figure_s1.pdf]

**A**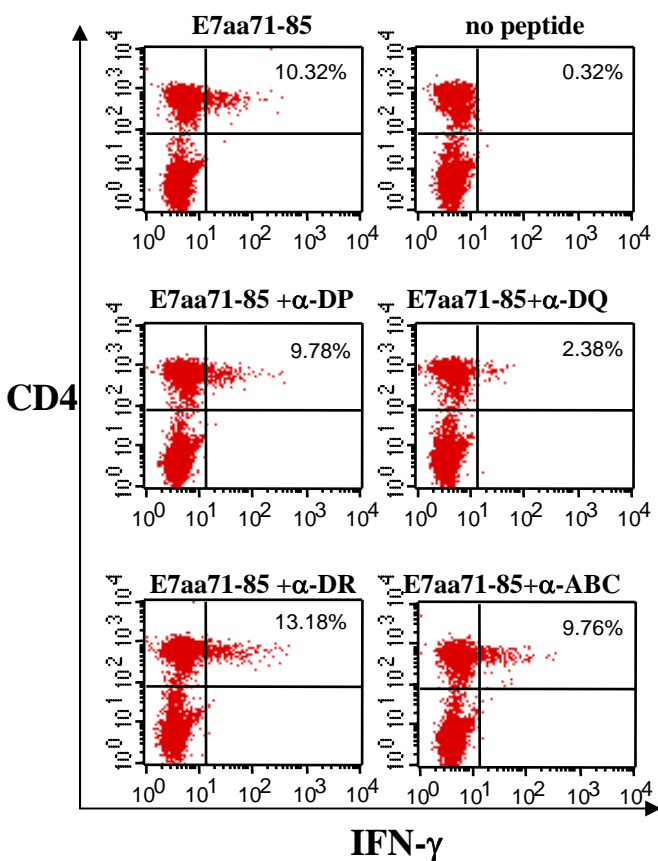**B**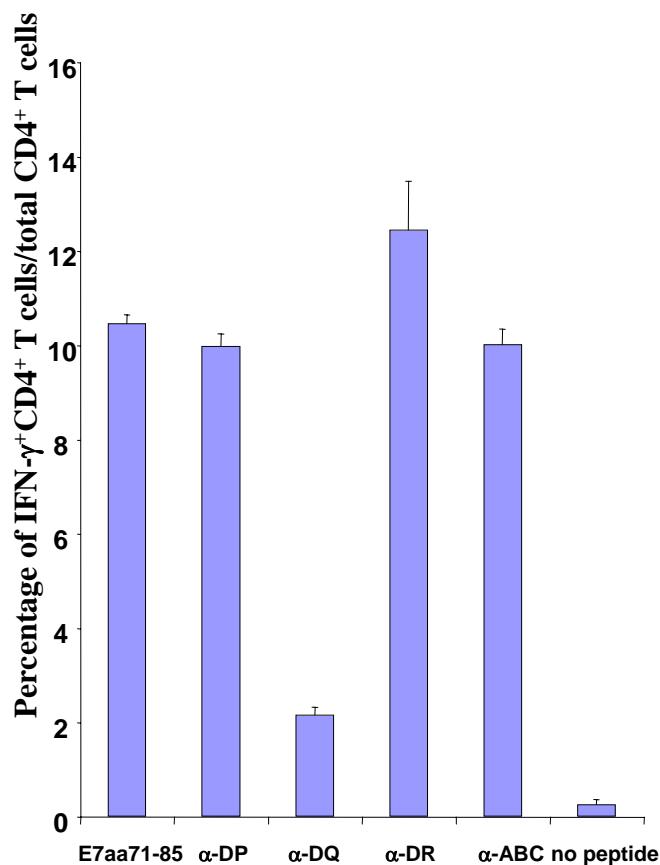

**Supplementary Figure S1. Intracellular IFN- $\gamma$  staining with flow cytometry analysis to determine the HLA class restriction responsible for presenting HPV-16 E7aa71-85 peptide to CD4 $^+$  T cells.** 5  $\mu$ g/ml of murine monoclonal antibodies against HLA-ABC, DP, DQ and DR were added into  $1 \times 10^5$  HPV-16 E7aa71-85 peptide-specific CD4 $^+$  T cell lines. 90 min later, E7aa71-85 peptides were added and cells were incubated at the presence of GolgiPlug for 20 hours. T cells were then stained for both CD4 and intracellular IFN- $\gamma$ . **A.** Representative figure of the flow cytometry data demonstrating the inhibition of CD4 $^+$  T cell immune responses using anti-HLA class I and II antibodies. **B.** Bar graph depicting the percentage of IFN- $\gamma^+$  CD4 $^+$  T cells per total CD4 $^+$  T cells (mean  $\pm$  s.d.).
